# Supplementary material
Source: MDPI journal article supplement (https://www.mdpi.com/2073-4344/12/11/1312)
Supplement: s1 [file s1 › catalysts-1959823-supplementary.pdf]

## Electronic Supplementary Information

# Microwave-Assisted Biodiesel Production Using UiO-66 MOF Derived Nanocatalyst: Process Optimization Using Response Surface Methodology

Shiva Prasad Gouda <sup>1</sup>, Jasha Momo H. Anal <sup>2,3</sup>, Puneet Kumar <sup>2,3</sup>, Amarajothi Dhakshinamoorthy <sup>4</sup>, Umer Rashid <sup>5</sup> and Samuel Lalthazuala Rokhum <sup>1,\*</sup>

<sup>1</sup> Department of Chemistry, National Institute of Technology Silchar, Silchar 788010, India

<sup>2</sup> Natural Products and Medicinal Chemistry Division, CSIR—Indian Institute of Integrative Medicine, Jammu 180001, India

<sup>3</sup> Academy of Scientific and Innovative Research (AcSIR), Ghaziabad 201002, India

<sup>4</sup> School of Chemistry, Madurai Kamaraj University, Madurai 625021, India

<sup>5</sup> Institute of Nanoscience and Nanotechnology, Universiti Putra Malaysia, Serdang 43400, Malaysia

\* Correspondence: rokhum@che.nits.ac.in

| Sl. No. | Caption                                                                                                                                                             | Figures   |
|---------|---------------------------------------------------------------------------------------------------------------------------------------------------------------------|-----------|
| 1.      | XPS survey spectrum of CaO-ZrO <sub>2</sub>                                                                                                                         | Figure S1 |
| 2.      | XRD of (a) pure CaO and snail-shell-derived-CaO, (b) m-ZrO <sub>2</sub> , t-ZrO <sub>2</sub> , UiO-66 derived ZrO <sub>2</sub> , and CaO-ZrO <sub>2</sub> catalyst. | Figure S2 |
| 3.      | <sup>1</sup> H and <sup>13</sup> C NMR spectra of the synthesized biodiesel.                                                                                        | Figure S3 |
| 4.      | FT-IR spectrum of synthesized biodiesel                                                                                                                             | Figure S4 |
| 5.      | EDS spectrum of the recovered catalyst after 5 transesterification cycles.                                                                                          | Figure S5 |
| 6.      | TOF calculation.                                                                                                                                                    |           |

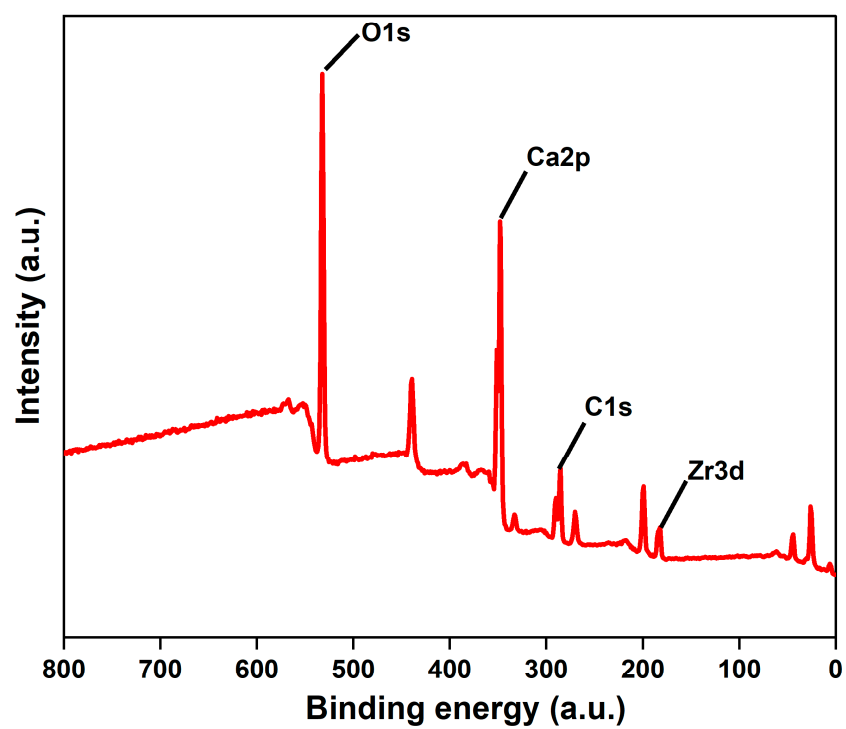

**Figure S1.** XPS survey spectrum of CaO-ZrO<sub>2</sub>

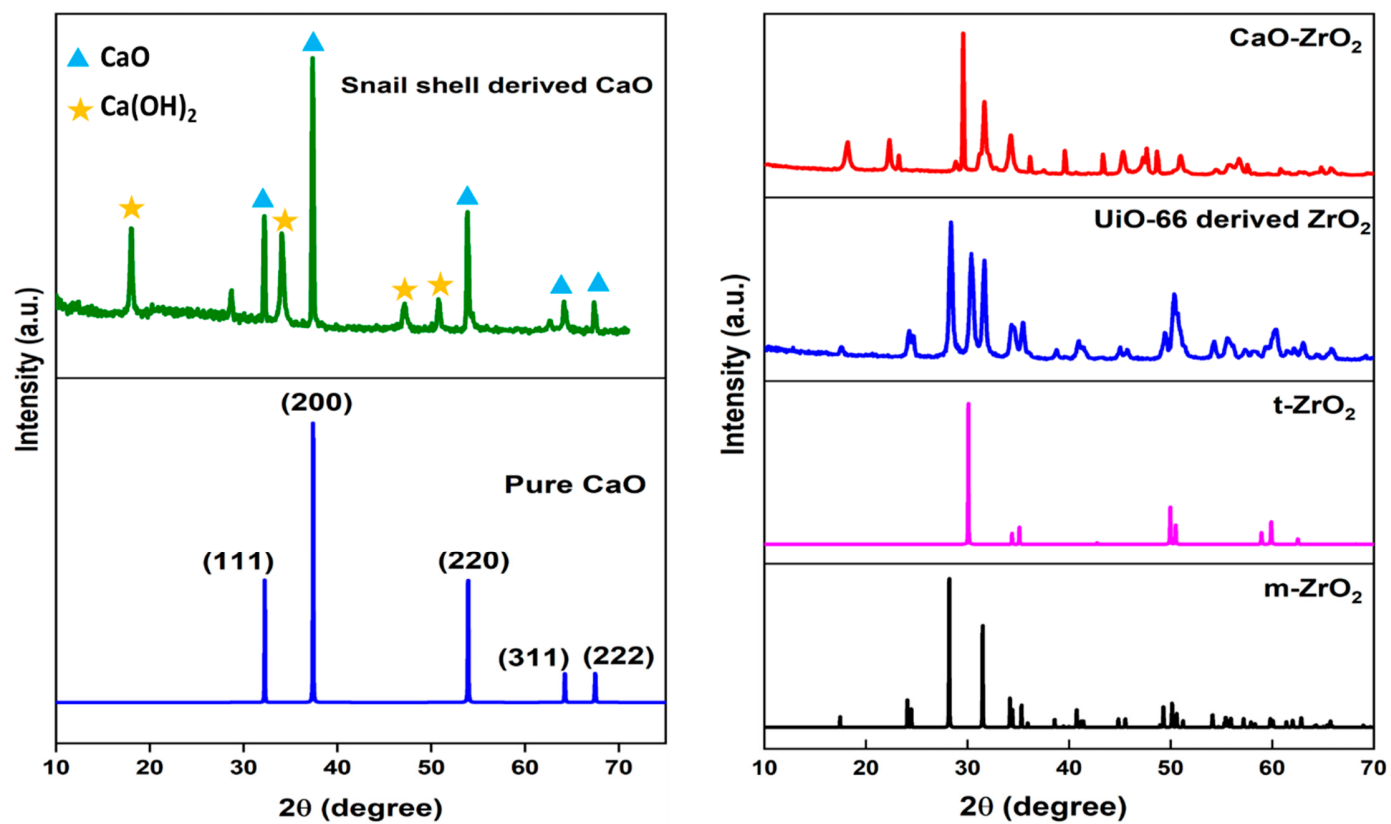

**Figure S2.** XRD of (a) pure CaO and snail-shell-derived-CaO, (b) m-ZrO<sub>2</sub>, t-ZrO<sub>2</sub>, UiO-66 derived ZrO<sub>2</sub> and CaO-ZrO<sub>2</sub> catalyst.

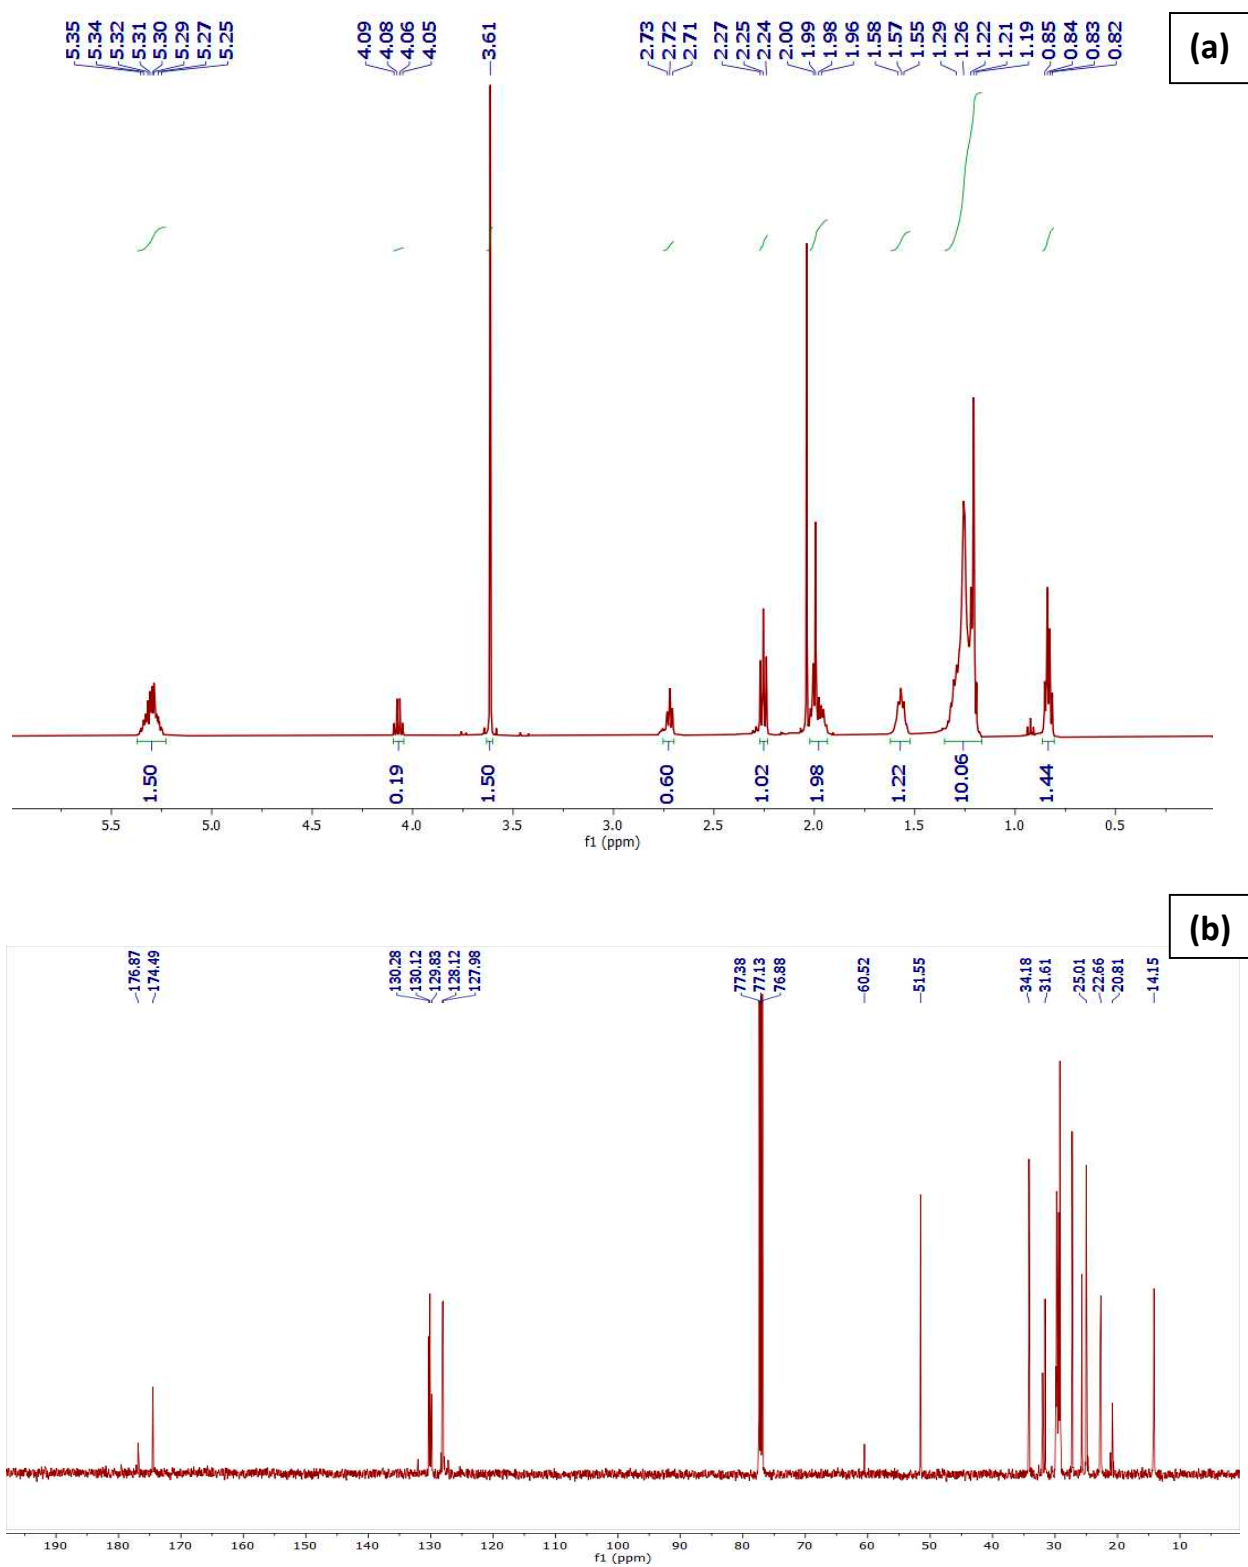

**Figure S3.**  $^1\text{H}$  (a) and  $^{13}\text{C}$  NMR (b) spectra of synthesized biodiesel.

Representative  $^1\text{H}$  NMR spectra (500 MHz,  $\text{CDCl}_3$ , 27  $^\circ\text{C}$ ) (a) Biodiesel produced using  $\text{CaO-ZrO}_2$  catalyst (conditions: 10:1 MTOR molar, 6 wt. % catalyst loading, 1 h reaction time and 70  $^\circ\text{C}$  reaction temperature). (b) Corresponding representative  $^{13}\text{C}$  NMR spectrum (126 MHz,  $\text{CDCl}_3$ , 27  $^\circ\text{C}$ ) for biodiesel produced using  $\text{CaO-ZrO}_2$  nanocatalyst. The corresponding numerical spectroscopic data for synthesized biodiesel are:  **$^1\text{H}$  NMR** (500 MHz,  $\text{CDCl}_3$ , 27  $^\circ\text{C}$ ):  $\delta$  5.3 (m, 2H), 4.06 (q, 2H), 3.61 (s, 3H), 2.72 (m, 2H), 2.25 (t, 4H), 2 (m, 2H), 1.57 (m, 2H), 1.23 (m, 20H), 0.84 (m, 2H).  **$^{13}\text{C}$  NMR** (126 MHz,  $\text{CDCl}_3$ , 27  $^\circ\text{C}$ ):  $\delta$  176.87, 129.83, 128.12, 60.52, 51.55, 34.18, 25.01, 22.66, 20.81, 14.15

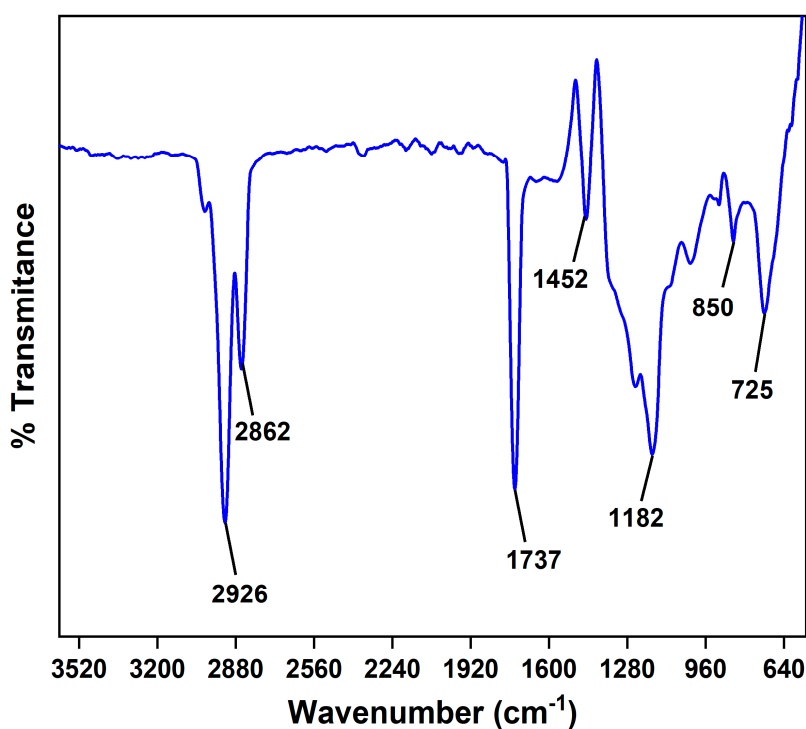

**Figure S4.** FT-IR spectrum of synthesized biodiesel.

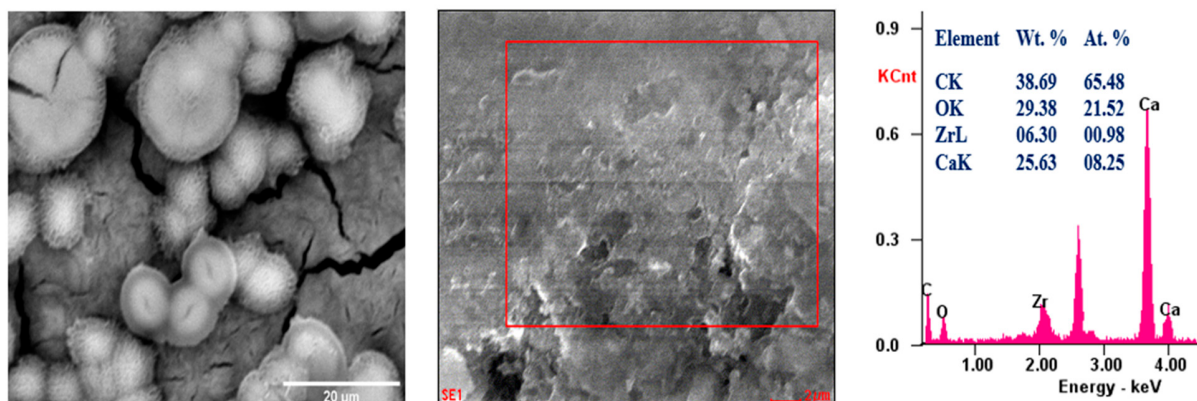

**Figure S5.** EDS spectrum of the recovered catalyst after 5 transesterification cycles.

#### Turnover frequency (TOF) calculation

$$\text{TOF} = \frac{\% \text{ Conversion of soybean oil}}{(\text{Time})(\text{Catalyst wt.})(\text{Molar mass of soybean oil})} \quad (\text{Eq. S1})$$
